# Supplementary material
Source: publisher site journal article supplement (https://www.dovepress.com/get_supplementary_file.php?f=230954.docx)
Supplement: Supplementary file 1 [file get_supplementary_file.php]

**Supplementary Figure S1**


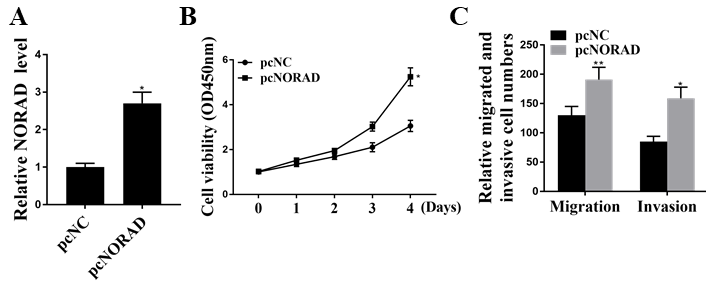


NORAD induced cell viability and progression. A. NORAD expression in A549 cells. B. CCK8 assay. C. Transwell assay for cell migration and cell invasion. *p<0.001, **p<0.05.
